# Supplementary material for: Fluvoxamine alleviates ER stress via induction of Sigma-1 receptor
Source: Springer Nature journal article supplement (doi:10.1038/cddis.2014.301), 2014-07-17

TOP

BOTTOM

1 2 3 4 5 6 7 8 9 10 11

calnexin

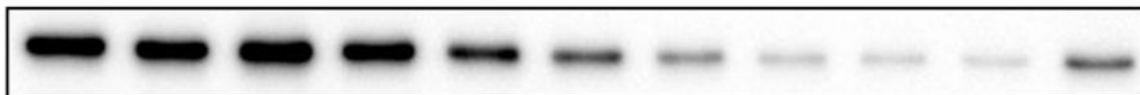

GM130

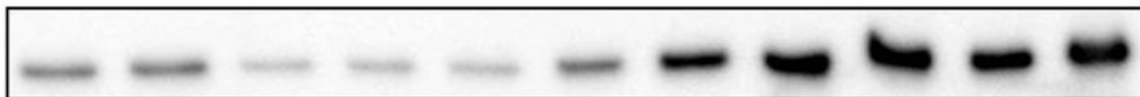Sig-1R  
+DMSO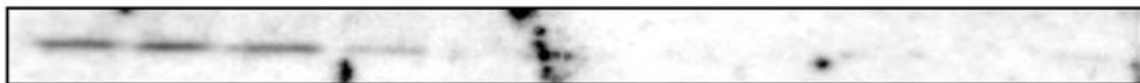Sig-1R  
+Flv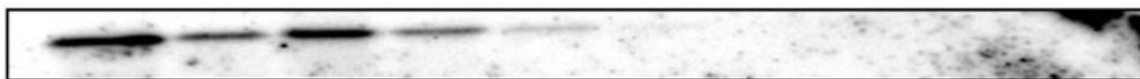

Supplement: 41419_2014_BFcddis2014301_MOESM100_ESM.pdf [file 41419_2014_BFcddis2014301_MOESM100_ESM.pdf]
